# Supplementary material for: Construction of 2D/2D BiOIO3/Bi2O2CO3 composite structures with face-to-face contacts can facilitate carrier transfer via a built-in electric field and a polar field for pyro–photo-electric catalysis
Source: Royal Society of Chemistry journal article supplement (doi:10.1039/d4tc01252f), 2024-01-01
Supplement: d4tc01252f1.pdf [file d4tc01252f1.pdf]

## Supporting information

Fig. S1 SEM diagram of (a) BiOIO<sub>3</sub>; (b) Bi<sub>2</sub>O<sub>2</sub>CO<sub>3</sub>; (c) BiOIO<sub>3</sub>/Bi<sub>2</sub>O<sub>2</sub>CO<sub>3</sub>

Fig. S2 The ideal temperature curve for cold-hot cycle

Fig. S3 The overpotential of BiOIO<sub>3</sub>, Bi<sub>2</sub>O<sub>2</sub>CO<sub>3</sub> and BiOIO<sub>3</sub>/Bi<sub>2</sub>O<sub>2</sub>CO<sub>3</sub> at 0.05 μA/cm<sup>2</sup> and 0.1 μA/cm<sup>2</sup>

Fig. S4 The equivalent circuit diagram of electrochemical impedance

Fig. S5 Mott-Schottky plots of BiOIO<sub>3</sub> and Bi<sub>2</sub>O<sub>2</sub>CO<sub>3</sub> under the dark condition

Table. S1 Atomic coordinate information, occupancy and thermodynamic parameters of BiOIO<sub>3</sub> obtained by Rietveld refining using X-ray powder diffraction data at room temperature

Table. S2 Atomic coordinate information, occupancy and thermodynamic parameters of Bi<sub>2</sub>O<sub>2</sub>CO<sub>3</sub> obtained by Rietveld refining using X-ray powder diffraction data at room temperature

Tab. S3 The band gap width values of BiOIO<sub>3</sub>, Bi<sub>2</sub>O<sub>2</sub>CO<sub>3</sub> and BiOIO<sub>3</sub>/Bi<sub>2</sub>O<sub>2</sub>CO<sub>3</sub>

Tab. S4 Flat band potential ( $V_{fb}$ ) of electrodes deduced from Mott-Schottky

### **Preparation of BiOIO<sub>3</sub> nanosheets**

In order to minimize the influence of experimental conditions on the experimental results, we prepared BiOIO<sub>3</sub> nanosheets using a similar hydrothermal process. 1 mmol Bi(NO<sub>3</sub>)<sub>3</sub>·5H<sub>2</sub>O was weighed and dissolved in 40 ml of deionized water with intense stirring until forming a milky white suspension. At the same time, 1 mmol KIO<sub>3</sub> was dissolved in 20 ml of deionized water until the solution was clear and transparent. The two solutions were mixed and stirred continuously for 10 min, and the obtained solution was transferred to 100 ml of Teflon-lined stainless-steel autoclave and heated at 180 °C for 10 h. After cooling naturally to room temperature, the solution was washed with deionized water and anhydrous ethanol for three times, respectively. Finally, the pure BiOIO<sub>3</sub> nanosheets were obtained by drying at 60 °C for 24 h.

### **Preparation of Bi<sub>2</sub>O<sub>2</sub>CO<sub>3</sub> nanosheets**

Firstly, 2 mmol of Bi(NO<sub>3</sub>)<sub>3</sub>·5H<sub>2</sub>O was dissolved in 40 ml of deionized water and stirred continuously until the solution was completely transformed into a milky white suspension. Then 6 mmol of CH<sub>4</sub>N<sub>2</sub>O was added to the above solution and stirred continuously for 10 min. Similarly, the resulting solution was transferred to a 100 ml Teflon-lined stainless-steel autoclave and kept warm at 180 °C for 24 h. After cooling naturally to room temperature, the solution was washed with deionized water and anhydrous ethanol for three times, respectively. Finally, the pure Bi<sub>2</sub>O<sub>2</sub>CO<sub>3</sub> nanosheets were obtained by drying at 60 °C for 24 h.

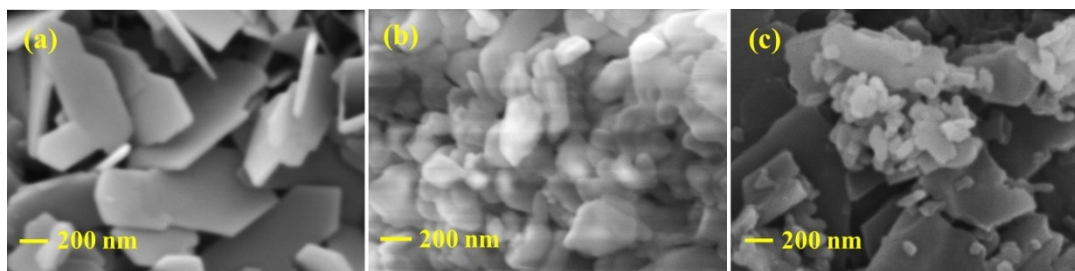

Fig. S1 SEM diagram of (a) BiOI; (b) Bi<sub>2</sub>O<sub>2</sub>CO<sub>3</sub>; (c) BiOI/Bi<sub>2</sub>O<sub>2</sub>CO<sub>3</sub>

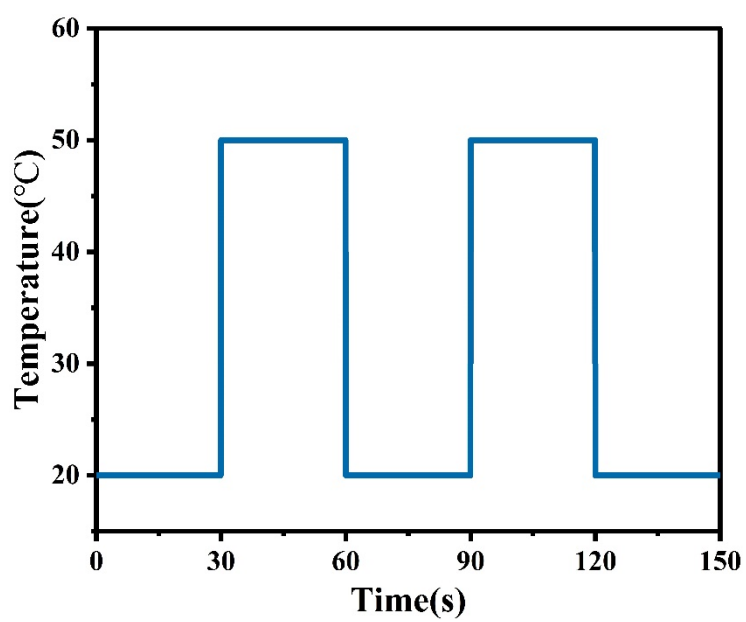

Fig. S2 The ideal temperature curve for cold-hot cycle

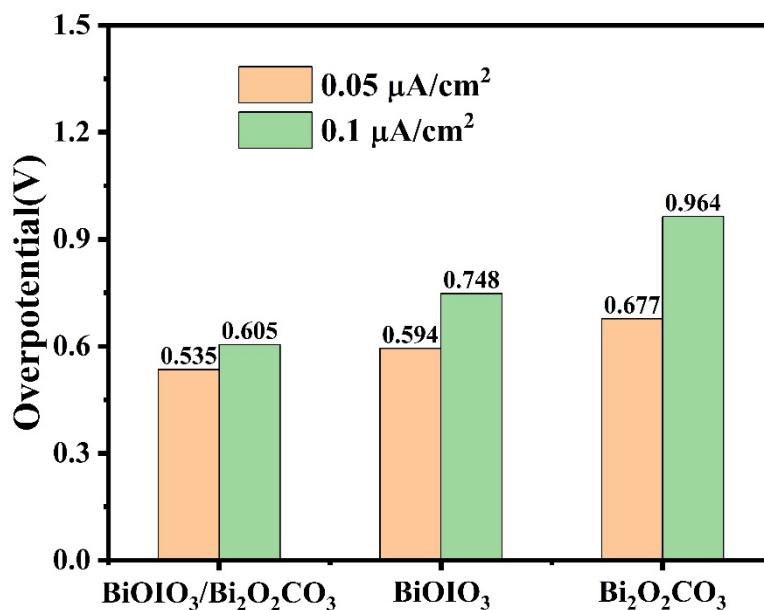

Fig. S3 The overpotential of BiOIO<sub>3</sub>, Bi<sub>2</sub>O<sub>2</sub>CO<sub>3</sub> and BiOIO<sub>3</sub>/Bi<sub>2</sub>O<sub>2</sub>CO<sub>3</sub> at 0.05  $\mu\text{A}/\text{cm}^2$  and 0.1  $\mu\text{A}/\text{cm}^2$

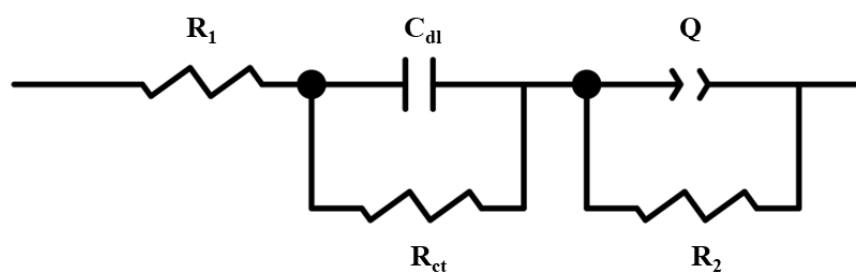

Fig. S4 The equivalent circuit diagram of electrochemical impedance

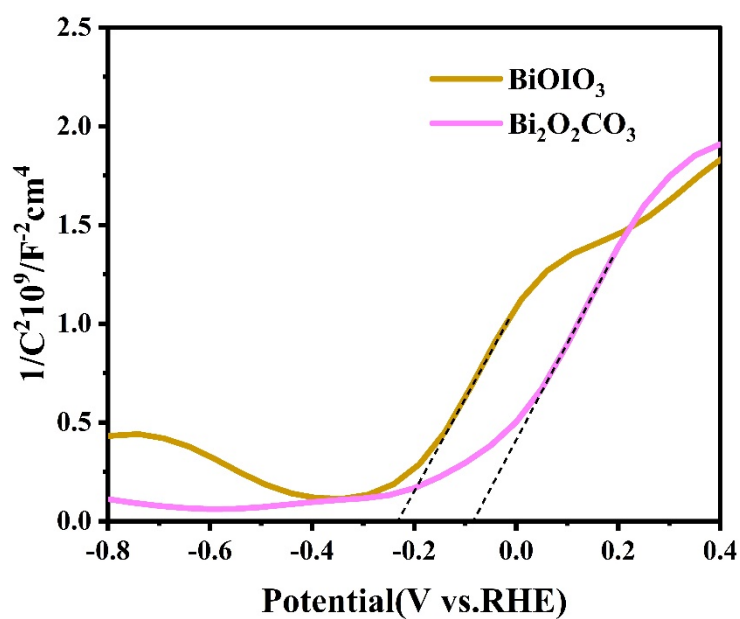

Fig. S5 Mott-Schottky plots of BiOIO<sub>3</sub> and Bi<sub>2</sub>O<sub>2</sub>CO<sub>3</sub> under the dark condition

Tab. S1 Atomic coordinate information, occupancy and thermodynamic parameters of BiOIO<sub>3</sub> obtained by Rietveld refining using X-ray powder diffraction data at room temperature

| Atom      | x       | y       | z       | Occupancy | Uiso/Å <sup>2</sup> | Mult |
|-----------|---------|---------|---------|-----------|---------------------|------|
| <b>Bi</b> | 0.01549 | 0.11358 | 0.69145 | 1         | 0.00966             | 4    |
| <b>I</b>  | 0.49333 | 0.36772 | 0.66828 | 1         | 0.00760             | 4    |
| <b>O1</b> | 0.20006 | 0.01017 | 0.98665 | 1         | 0.06805             | 4    |
| <b>O2</b> | 0.56433 | 0.20017 | 0.55160 | 1         | 0.55500             | 4    |
| <b>O3</b> | 0.62065 | 0.35110 | 0.89994 | 1         | 0.19795             | 4    |
| <b>O4</b> | 0.26085 | 0.38618 | 0.82996 | 1         | 0.03888             | 4    |

Tab. S2 Atomic coordinate information, occupancy and thermodynamic parameters of Bi<sub>2</sub>O<sub>2</sub>CO<sub>3</sub> obtained by Rietveld refining using X-ray powder diffraction data at room temperature

| Atom       | x       | y       | z       | Occupancy | Uiso/Å <sup>2</sup> | Mult |
|------------|---------|---------|---------|-----------|---------------------|------|
| <b>Bi1</b> | 0.00000 | 0.00000 | 0.05936 | 1         | 0.02622             | 2    |
| <b>Bi2</b> | 0.50000 | 0.50000 | 0.24489 | 1         | 0.00093             | 2    |
| <b>C</b>   | 0.00000 | 0.00000 | 0.30161 | 1         | 0.07733             | 2    |
| <b>O1</b>  | 0.00000 | 0.50000 | 0.06734 | 1         | 0.62014             | 2    |
| <b>O2</b>  | 0.50000 | 0.00000 | 0.12474 | 1         | 0.08056             | 2    |
| <b>O3</b>  | 0.00000 | 0.45356 | 0.25525 | 1         | 0.60645             | 2    |
| <b>O4</b>  | 0.00000 | 0.00000 | 0.40690 | 1         | 0.24719             | 2    |

Tab. S3 The band gap width values of BiOIO<sub>3</sub>, Bi<sub>2</sub>O<sub>2</sub>CO<sub>3</sub> and BiOIO<sub>3</sub>/Bi<sub>2</sub>O<sub>2</sub>CO<sub>3</sub>

| Sample               | BiOIO <sub>3</sub> | Bi <sub>2</sub> O <sub>2</sub> CO <sub>3</sub> | BiOIO <sub>3</sub> /Bi <sub>2</sub> O <sub>2</sub> CO <sub>3</sub> |
|----------------------|--------------------|------------------------------------------------|--------------------------------------------------------------------|
| <b>Band gap (eV)</b> | 2.99               | 3.21                                           | 2.56                                                               |

Tab. S4 Flat band potential ( $V_{fb}$ ) of electrodes deduced from Mott-Schottky

| Sample                                     | BiOIO <sub>3</sub> |            |                   | BiOIO <sub>3</sub> /Bi <sub>2</sub> O <sub>2</sub> CO <sub>3</sub> |            |                   |
|--------------------------------------------|--------------------|------------|-------------------|--------------------------------------------------------------------|------------|-------------------|
|                                            | light              | $\Delta T$ | light+ $\Delta T$ | light                                                              | $\Delta T$ | light+ $\Delta T$ |
| <b><math>V_{fb}</math> (V)<br/>Vs. RHE</b> | -0.383             | -0.213     | -0.481            | -0.423                                                             | -0.356     | -0.537            |
